# Supplementary material for: Effect of polymer-to-silica ratio on the formation of large three-dimensional cage-like mesostructures
Source: Royal Society of Chemistry journal article supplement (doi:10.1039/b603436e), 2006-01-01
Supplement: b603436e.pdf [file b603436e.pdf]

## Effect of polymer-to-silica ratio on the formation of large three-dimensional cage-like mesostructures

Rafal M. Grudzien<sup>a</sup>, Bogna E. Grabicka<sup>a</sup>, Maciej Kożak,<sup>b</sup> Stanislaw Pikus<sup>c</sup> and Mietek Jaroniec<sup>a\*</sup>

<sup>a</sup> Department of Chemistry, Kent State University, Kent, Ohio 44240, USA, Fax: (330) 672 3816; Tel: (330) 672 3790; E-mail: [jaroniec@kent.edu](mailto:jaroniec@kent.edu)

<sup>b</sup> Department of Macromolecular Physics, A. Mickiewicz University, 61-614 Poznań, Poland

<sup>c</sup> Department of Chemistry, Maria Curie-Skłodowska University, 20-031 Lublin, Poland

**Table S1** Parameters obtained from Small Angle X-ray Scattering (SAXS) for the calcined FDU1 samples studied

| Sample   | $2\theta$ (deg.) <sup>a</sup> | $d$ (nm) <sup>b</sup> | $hkl$ <sup>c</sup> | FWHM <sup>d</sup> | $a$ (nm) <sup>e</sup> |
|----------|-------------------------------|-----------------------|--------------------|-------------------|-----------------------|
| FDU1-1   | 0.66                          | 13.32                 | 111                | 0.11              | 23.10                 |
|          | 1.16                          | 7.64                  | 220                |                   | 21.60                 |
|          | 1.34                          | 6.59                  | 311                |                   | 21.90                 |
|          | 1.64                          | 5.40                  | 400                |                   | 21.60                 |
|          | 1.76                          | 5.01                  | 420                |                   | 22.40                 |
| FDU1-1.5 | 0.66                          | 13.47                 | 111                | 0.12              | 23.33                 |
|          | 1.14                          | 7.72                  | 220                |                   | 21.83                 |
|          | 1.32                          | 6.71                  | 311                |                   | 22.24                 |
|          | 1.58                          | 5.61                  | 400                |                   | 22.42                 |
|          | 1.75                          | 5.04                  | 420                |                   | 22.53                 |
| FDU1-2   | 0.66                          | 13.47                 | 111                | 0.11              | 23.33                 |
|          | 1.16                          | 7.64                  | 220                |                   | 21.61                 |
|          | 1.32                          | 6.70                  | 311                |                   | 22.20                 |
|          | 1.76                          | 5.03                  | 420                |                   | 22.49                 |
| FDU1-2.5 | 0.66                          | 13.47                 | 111                | 0.12              | 23.33                 |
|          | 1.13                          | 7.83                  | 220                |                   | 22.15                 |
|          | 1.30                          | 6.81                  | 311                |                   | 22.58                 |
| FDU1-3   | 0.67                          | 132                   | 111                | 0.10              | 22.86                 |
|          | 1.16                          | 7.59                  | 220                |                   | 21.47                 |
|          | 1.35                          | 6.56                  | 311                |                   | 21.75                 |
|          | 1.78                          | 4.97                  | 420                |                   | 22.23                 |
|          | 2.39                          | 3.69                  | 600                |                   | 22.17                 |
| FDU1-3.5 | 0.69                          | 12.78                 | 111                | 0.16              | 22.10                 |
|          | 1.37                          | 6.46                  | 311                |                   | 21.40                 |
|          | 1.79                          | 4.93                  | 420                |                   | 22.00                 |
| FDU1-4   | 0.80                          | 11.08                 | 111                | 0.30              | 19.20                 |
|          | 1.49                          | 5.91                  | 311                |                   | 19.70                 |
|          | 2.45                          | 3.61                  | 300                |                   | 12.47                 |

<sup>a</sup> $2\theta$  – scattering angle; <sup>b</sup> $d$  – interplanar spacing; <sup>c</sup> $hkl$  – Muller indexes; <sup>d</sup>FWHM- full width at half maximum of the most intense peak; <sup>e</sup> $a$  – unit cell parameter.

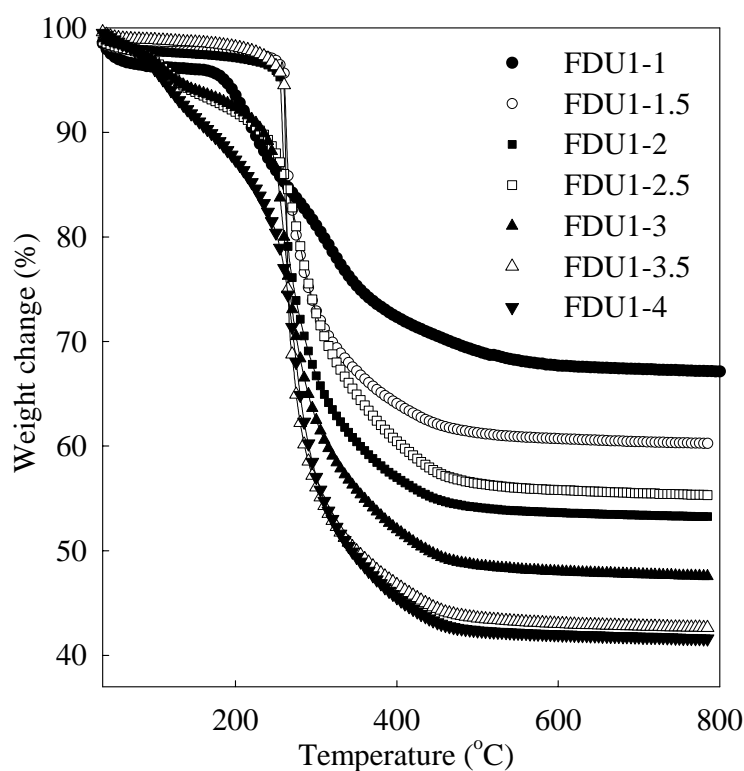

**Fig. S1** Thermogravimetric weight curves measured in flowing nitrogen for the FDU1 samples studied.

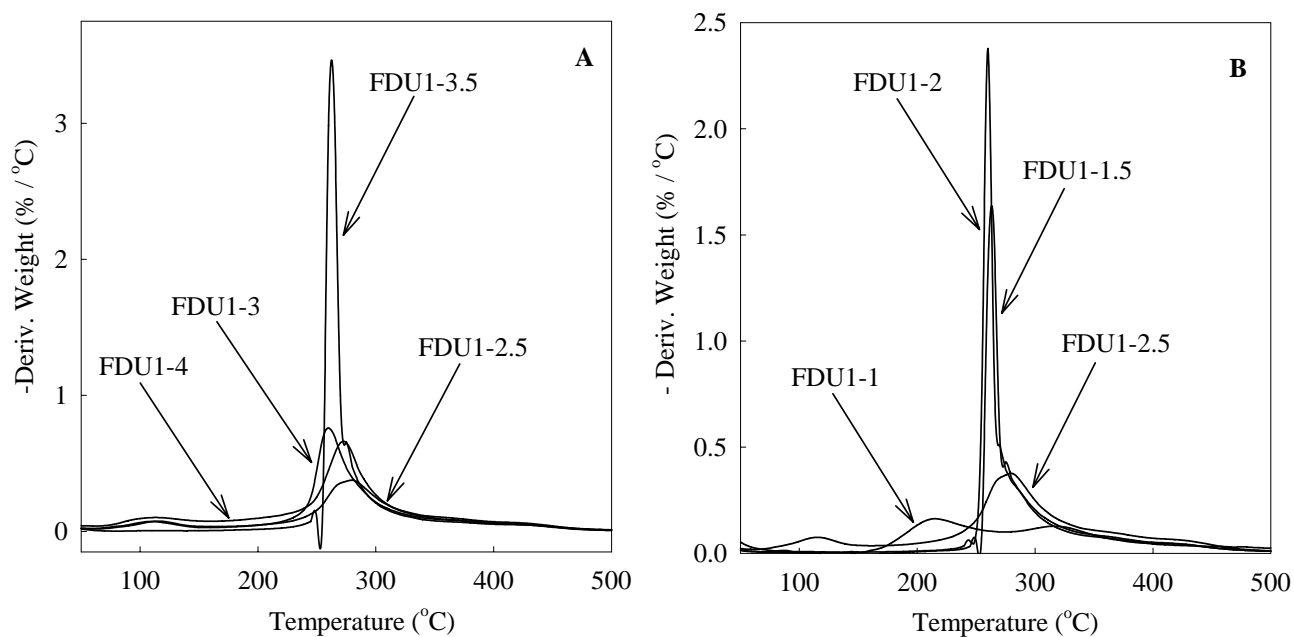

**Fig. S2** Differential thermogravimetric curves for the FDU1 samples studied.
